# Supplementary material
Source: publisher figshare collection journal article supplement (https://acs.figshare.com/ndownloader/files/24645856)
Supplement: Supplementary file 1 [file 24645856]

**Cu<sub>3</sub>Mo<sub>2</sub>O<sub>9</sub>/BiVO<sub>4</sub> heterojunction film with integrated thermodynamic and kinetic advantages for solar water oxidation**

Biao Xiong, <sup>†</sup> Yuting Wu, <sup>†</sup> Jinyan Du, <sup>†</sup> Jie Li, <sup>†</sup> Binyao Liu, <sup>†</sup> Gaili Ke, <sup>†</sup> Huichao He, <sup>†\*</sup> Yong Zhou <sup>‡ \*</sup>

<sup>†</sup>State Key Laboratory of Environmental-Friendly Energy Materials, School of Materials Science and Engineering, Southwest University of Science and Technology, Mianyang 621010, China.

<sup>‡</sup>Ecomaterials and Renewable Energy Research Center, School of Physics, Nanjing University, Nanjing 211102, China.

Huichao He: E-mail: [hehuichao@swust.edu.cn](mailto:hehuichao@swust.edu.cn);

Yong Zhou: E-mail: [zhouyong1999@nju.edu.cn](mailto:zhouyong1999@nju.edu.cn);

Number of pages: 16

Number of figures: 10

Number of tables: 1

## 1. EXPERIMENTAL SECTION

### 1.1 Preparation of BiVO<sub>4</sub> film

The BiVO<sub>4</sub> film was prepared on fluorine-doped tin oxide glass substrate (FTO, 1 cm×2 cm, sheet resistance<15 Ω) by a BiOI template method. First of all, 5 mM Bi(NO<sub>3</sub>)<sub>3</sub>·5H<sub>2</sub>O (99.0%, Aladdin) and 5 mM KI (99.0%, Sigma-Aldrich) aqueous solution were used as the Bi<sup>3+</sup> and I<sup>-</sup> precursor solution, respectively. Next, a piece of FTO was vertically immersed into the Bi<sup>3+</sup> precursor solution for 10 s, and then into the I<sup>-</sup> precursor solution for 10 s. This immersion operation was repeated for 10 min to form an orange-red BiOI layer on the FTO. Then, 100 μL of 0.2 M VO(acac)<sub>2</sub> (99.5%, Aladdin) dimethyl sulfoxide solution was dripped on the BiOI layer, and annealed in air at 450°C for 120 min. Finally, the resultant BiVO<sub>4</sub> film with excess vanadium oxide on surface was soaked into 2 M KOH for 30 min with gentle stirring to remove the vanadium oxide. For comparison, the as-prepared BiVO<sub>4</sub> film was further post-annealed in argon-saturated environment at 400°C for 2 h.

### 1.2 Preparation of Cu<sub>3</sub>Mo<sub>2</sub>O<sub>9</sub>/BiVO<sub>4</sub> film

The Cu<sub>3</sub>Mo<sub>2</sub>O<sub>9</sub>/BiVO<sub>4</sub> film was prepared by hydrothermal approach with post-annealing. The experimental procedures are as follows. (1) 2.25 mM cupric nitrate Cu(NO<sub>3</sub>)<sub>2</sub>, 99.99%) and sodium molybdate dihydrate (Na<sub>2</sub>MoO<sub>4</sub>·2H<sub>2</sub>O, 99.995%) aqueous solution was used as the precursor solution. (2) 30 mL of Cu<sup>2+</sup>/Mo<sup>6+</sup> precursor solution was transferred into a Teflon-lined autoclave (50 mL), and the as-prepared BiVO<sub>4</sub> film was vertically put into the precursor solution. (3) The Teflon-lined autoclave was kept at 180 °C for 15 h of hydrothermal reaction. (4) After the hydrothermal reaction, the resultant film was annealed in argon-saturated environment at 400°C for 2 h. In addition, CuOx/BiVO<sub>4</sub> film was prepared for comparison to the Cu<sub>3</sub>Mo<sub>2</sub>O<sub>9</sub>/BiVO<sub>4</sub> film. The CuOx nanoparticles are the mixture of Cu<sub>2</sub>O and CuO nanoparticles that were synthesized by a hydrothermal reaction at 160°C for 8 h using 0.1 M cupric acetate aqueous solution. After the hydrothermal reaction, 30 μL of hydrothermal reaction solution that contains CuOx nanoparticles was dripped on the BiVO<sub>4</sub> film. The resultant film was dried at 60°C for 1 h, and then annealed at 400°C for 2 h in air. The XRD characterization of the CuOx nanoparticles and

the preparation optimization for the CuOx/BiVO<sub>4</sub> film were shown in **Figure S1**.

For comparison, Cu<sub>3</sub>Mo<sub>2</sub>O<sub>9</sub> film was prepared through coating Cu<sub>3</sub>Mo<sub>2</sub>O<sub>9</sub> nanoparticles on the FTO. Specifically, after the hydrothermal reaction for the preparation of Cu<sub>3</sub>Mo<sub>2</sub>O<sub>9</sub>/BiVO<sub>4</sub> film, 50  $\mu$ L of hydrothermal reaction solution that contains Cu<sub>3</sub>Mo<sub>2</sub>O<sub>9</sub> nanoparticles was dripped on the FTO, and then be dried at 80°C for 1 h. Finally, the Cu<sub>3</sub>Mo<sub>2</sub>O<sub>9</sub> nanoparticles-coupled FTO was annealed at 400°C for 2 h in argon-saturated environment.

### 1.3 Material characterizations

The morphology and elemental composition of BiVO<sub>4</sub>, Cu<sub>3</sub>Mo<sub>2</sub>O<sub>9</sub> and Cu<sub>3</sub>Mo<sub>2</sub>O<sub>9</sub>/BiVO<sub>4</sub> films were investigated using a scanning electron microscope with EDS mapping function (SEM, Zeiss Supra 55 VP). The crystal phase of the as-prepared samples was checked by X-ray diffractometer (XRD, PANalytical X'pert PRO diffractometer). X-ray photoelectron spectroscopy (XPS) investigations for the samples were performed on a Kratos AXIS Ultra DLD XPS system. The UV-Vis absorption and photoluminescence (PL) emission spectra of the films were recorded on a Shimadzu UV-2600/2700 spectrophotometer and a SPEX 500 M spectrometer (in air at 25°C, 325 nm laser as the excitation source), respectively. In addition, the films were analyzed by laser Raman spectrometer (Renishaw inVia Raman). After 5 h of stability testing, the dissolved V and Bi from the BiVO<sub>4</sub> and Cu<sub>3</sub>Mo<sub>2</sub>O<sub>9</sub>/BiVO<sub>4</sub> film photoanodes into the NaPi electrolyte were detected by inductively coupled plasma atomic emission spectrometry (ICP-AES, Thermo ICAP6300).

### 1.4 Electrochemical and photoelectrochemical measurements

The electrochemical and photoelectrochemical measurements for the film samples were carried out on CHI660E workstation with a three-electrode system. A Pt wire electrode and a saturated calomel electrode (SCE) were used as the counter electrode and reference electrode, respectively. 0.2 M NaPi buffer solution (Na<sub>2</sub>HPO<sub>4</sub>/NaH<sub>2</sub>PO<sub>4</sub>, pH 6.8) was used as the electrolyte. For the PEC measurements, a 300W xenon lamp with an AM 1.5G filter (Beijing China Education Au-light Co. Ltd.) was used to provide 100 mW/cm<sup>2</sup> simulated sunlight irradiation. The PEC measurements were performed using backside irradiation, namely, the irradiation passed through the FTO and then

reached on the film. The measured potentials vs. SCE reference electrode were converted into the potentials vs. reversible hydrogen reference electrode (RHE) through the following Nernst equation.

$$E_{\text{RHE}} = E_{\text{SCE}}^{\theta} + E_{\text{SCE}} + 0.059 \text{pH} \quad (E_{\text{SCE}}^{\theta} = 0.2415 \text{ V vs. NHE, at 298K}) \quad (\text{S1})$$

The electrochemically active surface area (ECSA) of the BiVO<sub>4</sub> and Cu<sub>3</sub>Mo<sub>2</sub>O<sub>9</sub>/BiVO<sub>4</sub> film was measured and calculated by equation (2).

$$\text{ECSA} = C_{\text{dl}} / C_{\text{s}} \quad (\text{S2})$$

Where  $C_{\text{dl}}$  is the double-layer capacitance of the film electrode,  $C_{\text{s}}$  is the specific capacitance of the FTO electrode.  $C_{\text{dl}}$  was measured by cyclic voltammograms (CVs) in a non-Faradaic range from 0.75 to 0.95 V vs. RHE with different scan rates (shown in **Figure S5b** and **S5c**). The anodic-cathodic current density ( $\Delta I$ ) at 0.85 V vs. RHE, and the scan rate extracted from a series of CV curves were fitted into a linear relationship (**Figure S5e**), and the value of  $C_{\text{dl}}$  was the half of the slope of  $\Delta I$  vs. scan rates curve. Since the surface of BiVO<sub>4</sub>-based film electrodes are not smooth as expected, the  $C_{\text{s}}$  value of the BiVO<sub>4</sub>-based film electrodes was placed by the  $C_{\text{s}}$  of the FTO electrode to calculate their ECSA.

The incident photon-to-current conversion efficiency (IPCE) for the film photoanodes was measured at 1.23 V vs. RHE in 0.2 M NaPi buffer under monochromatic light of 400-530nm irradiation. The equation (3) was used to calculate the films' IPCE.

$$\text{IPCE}(\%) = (1240 \times j) / (P_{\text{light}} \times \lambda) \times 100\% \quad (\text{S3})$$

Where  $j$  is the photocurrent density of film (mA/cm<sup>2</sup>) under monochromatic light irradiation,  $P_{\text{light}}$  is the power density of incident light (mW/cm<sup>2</sup>), and  $\lambda$  represents the wavelength of incident light (nm).

The Faradaic efficiency of the Cu<sub>3</sub>Mo<sub>2</sub>O<sub>9</sub>/BiVO<sub>4</sub> film photoanode for O<sub>2</sub> evolution reaction was checked. Under AM 1.5 G illumination, the Cu<sub>3</sub>Mo<sub>2</sub>O<sub>9</sub>/BiVO<sub>4</sub> photoanode was put into a gas-tight cell that linked with an Agilent 7890B gas chromatography. The amount of O<sub>2</sub> evolution on the photoanode at 1.23 V vs. RHE was detected by the gas chromatography, and the photogenerated charge was recorded on a CHI660E workstation. The Faradaic

efficiency of O<sub>2</sub> evolution [ $\eta(\text{O}_2)$ ] on the Cu<sub>3</sub>Mo<sub>2</sub>O<sub>9</sub>/BiVO<sub>4</sub> photoanode was calculated with the following equation.

$$\eta(\text{O}_2) = (\text{detected O}_2 \text{ evolution amount}) \times 100 / (\text{theoretical O}_2 \text{ evolution}) \quad (\text{S4})$$

The intensity modulated photocurrent spectroscopy (IMPS) for the film photoanodes was measured to investigate their charge transfer property. The IMPS and IMVS measurements were performed on a Zennium PP211 station with the frequency of 100 K to 0.1 Hz, and 365 nm monochromatic light with a power density of 100 mW/cm<sup>2</sup> was used as the irradiation source. The average holes-transfer time ( $\tau$ ) of the film photoanodes was estimated by the following equation.

$$\tau_{tr} = 1 / (2\pi f_{min}) \quad (\text{S5})$$

where the  $f_{min}$  is the minimum frequency in the imaginary components of IMPS or IMVS.

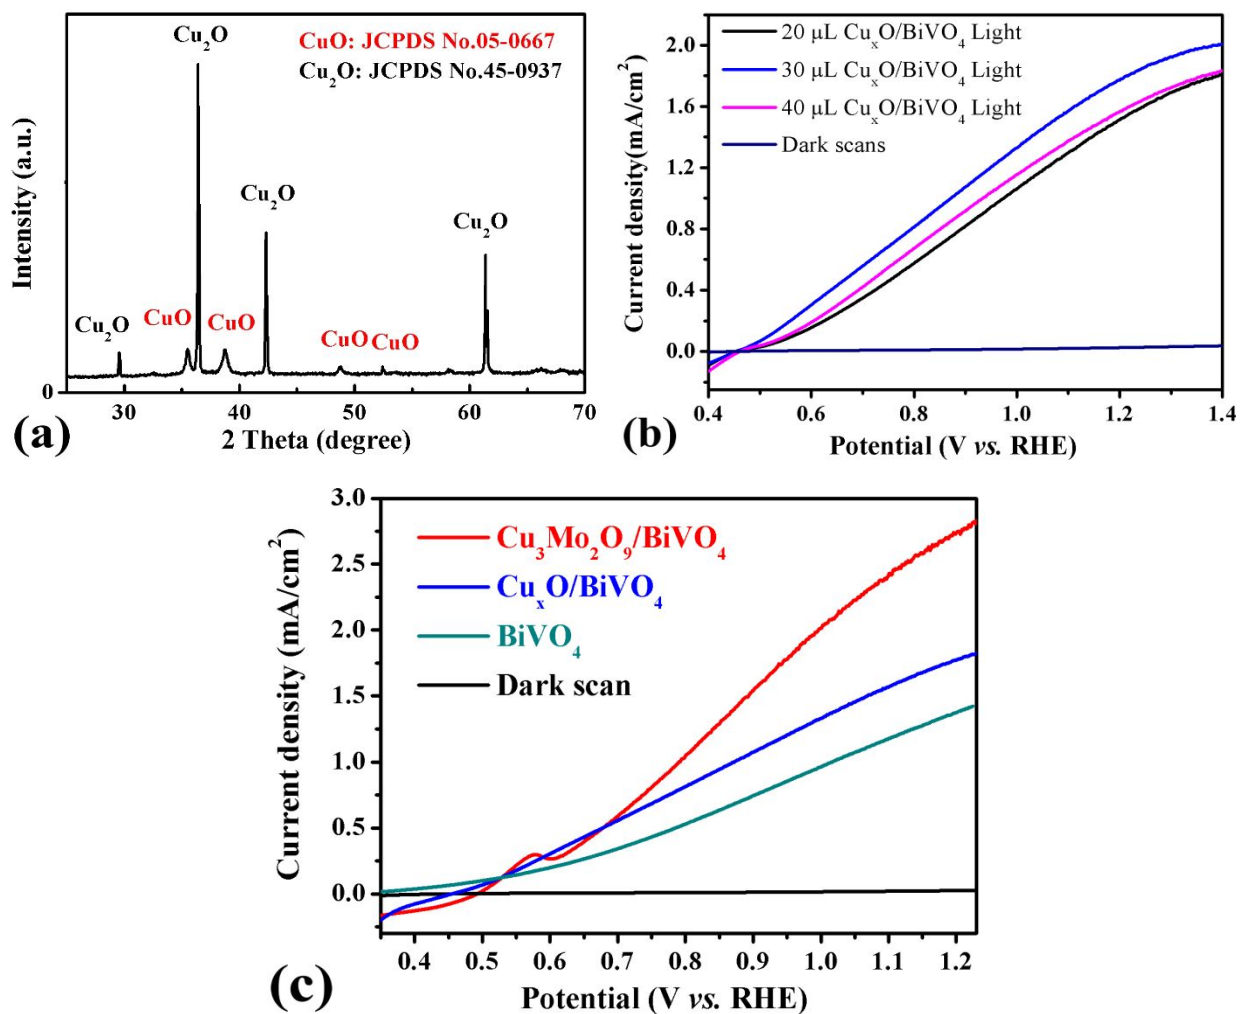

**Figure S1.** (a) XRD pattern of the as-prepared copper oxides sample. (b) LSV scans for the copper oxides/ $\text{BiVO}_4$  films that prepared by coupling different amount of copper oxides. (c) LSV scans for the optimized copper oxides/ $\text{BiVO}_4$  film and the  $\text{Cu}_3\text{Mo}_2\text{O}_9/\text{BiVO}_4$  film. The LSV scan conducted in 0.2 M NaPi buffer under AM 1.5G illumination with a scan rate of 15 mV/s.

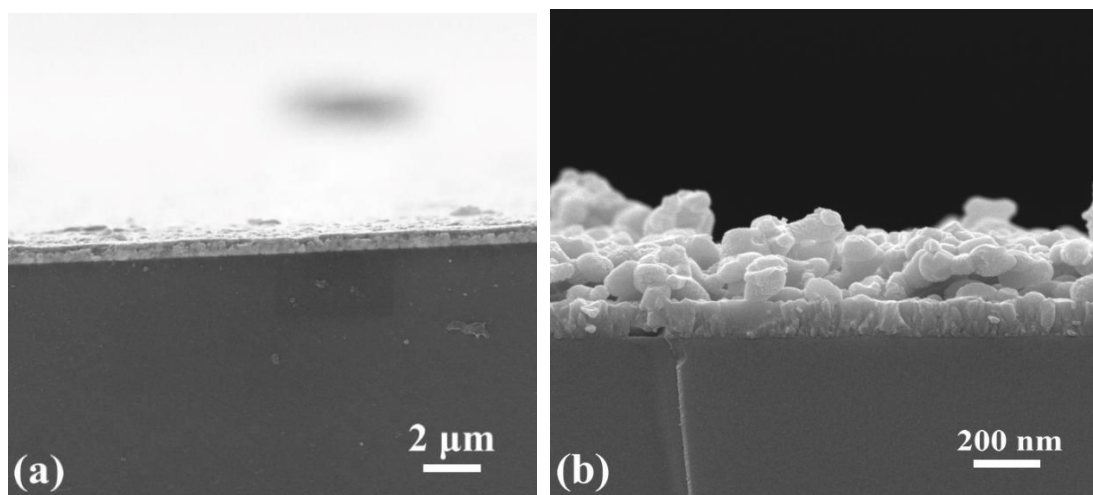

**Figure S2.** The cross-sectional SEM images (a) and (b) of the  $\text{Cu}_3\text{Mo}_2\text{O}_9/\text{BiVO}_4$  film.

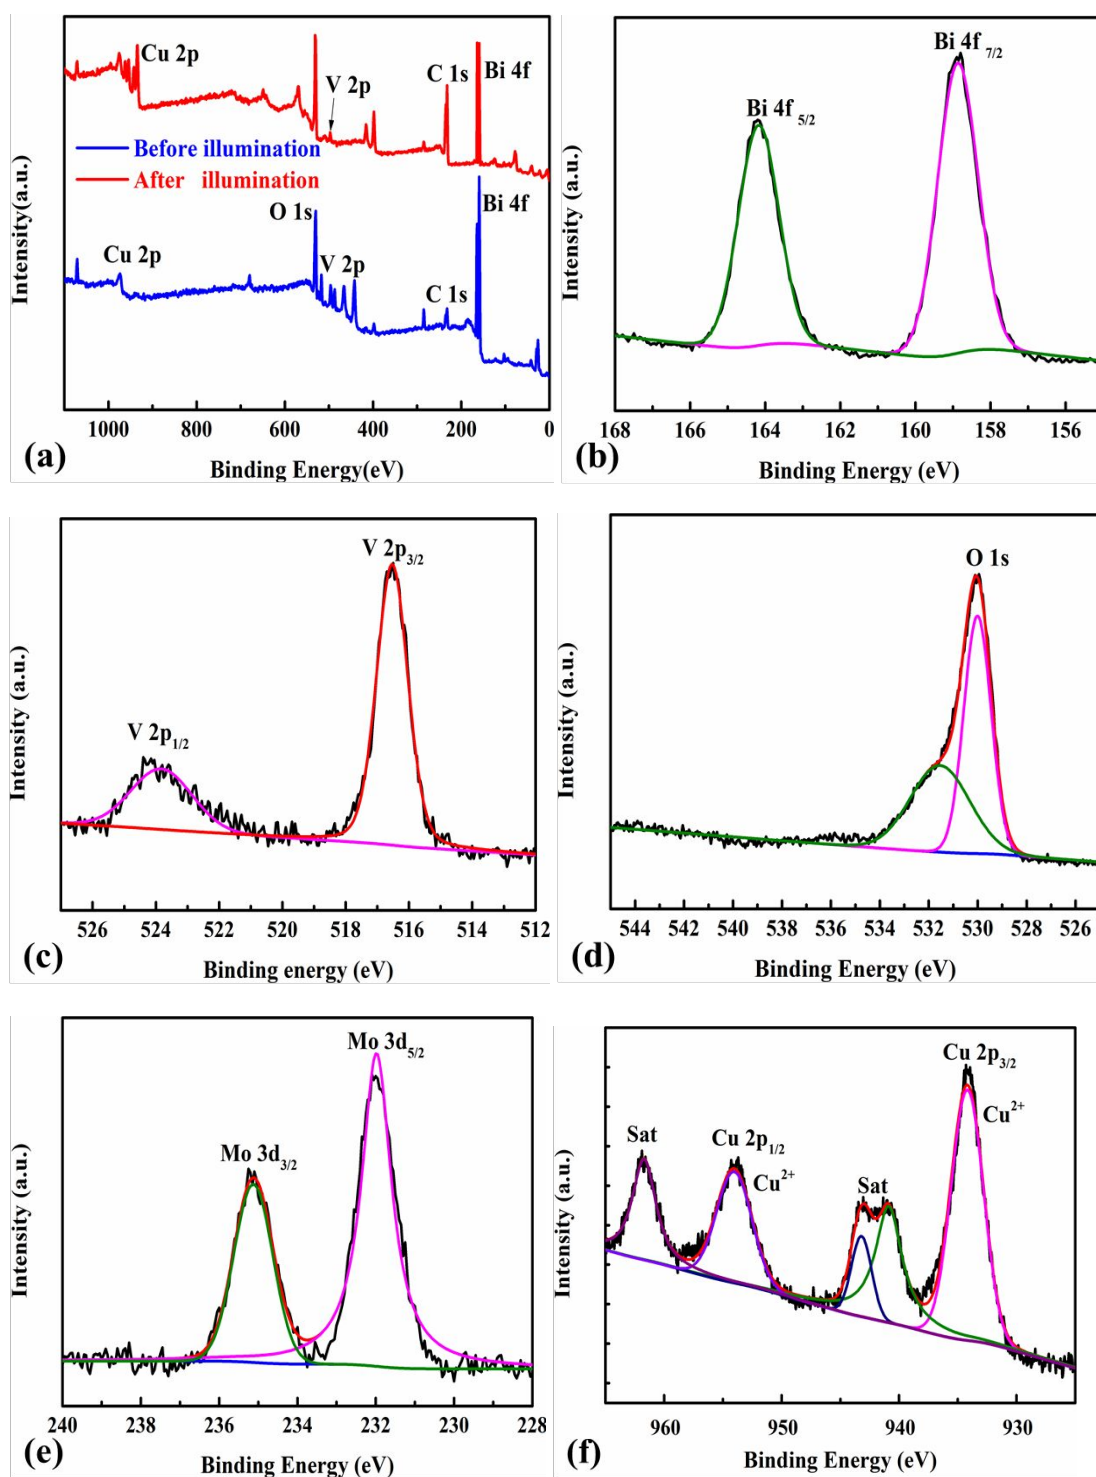

**Figure S3.** (a) Survey XPS spectrum of the  $\text{Cu}_3\text{Mo}_2\text{O}_9/\text{BiVO}_4$  film. High-resolution (b) Bi 4f, (c) V 2p, (d) O 1s, (e) Mo 3d and (f) Cu 2p XPS spectrum of the  $\text{Cu}_3\text{Mo}_2\text{O}_9/\text{BiVO}_4$  film.



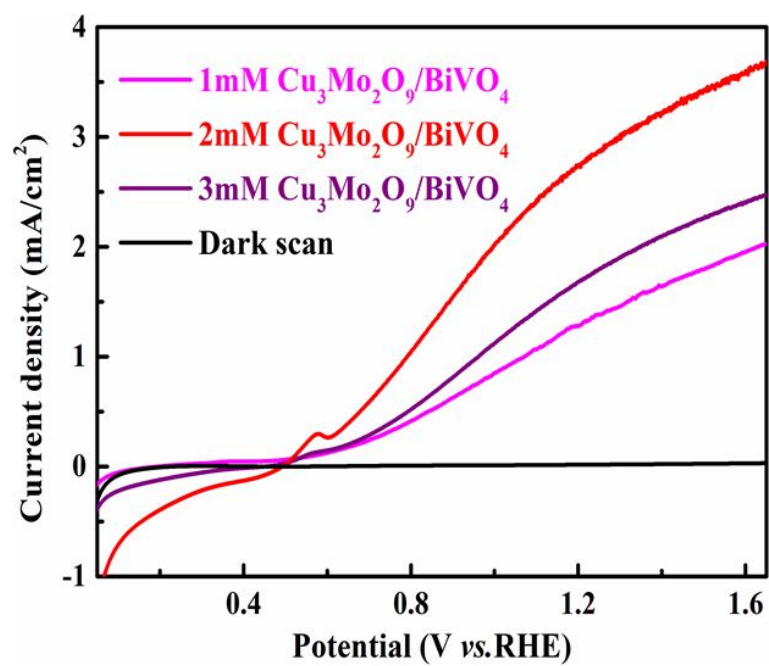

**Figure S4.** LSV scans for the  $\text{Cu}_3\text{Mo}_2\text{O}_9/\text{BiVO}_4$  films that be prepared using different  $\text{Cu}^{2+}$ ,  $\text{Mo}^{6+}$ -concentrations of precursor solution under same hydrothermal temperature and time.

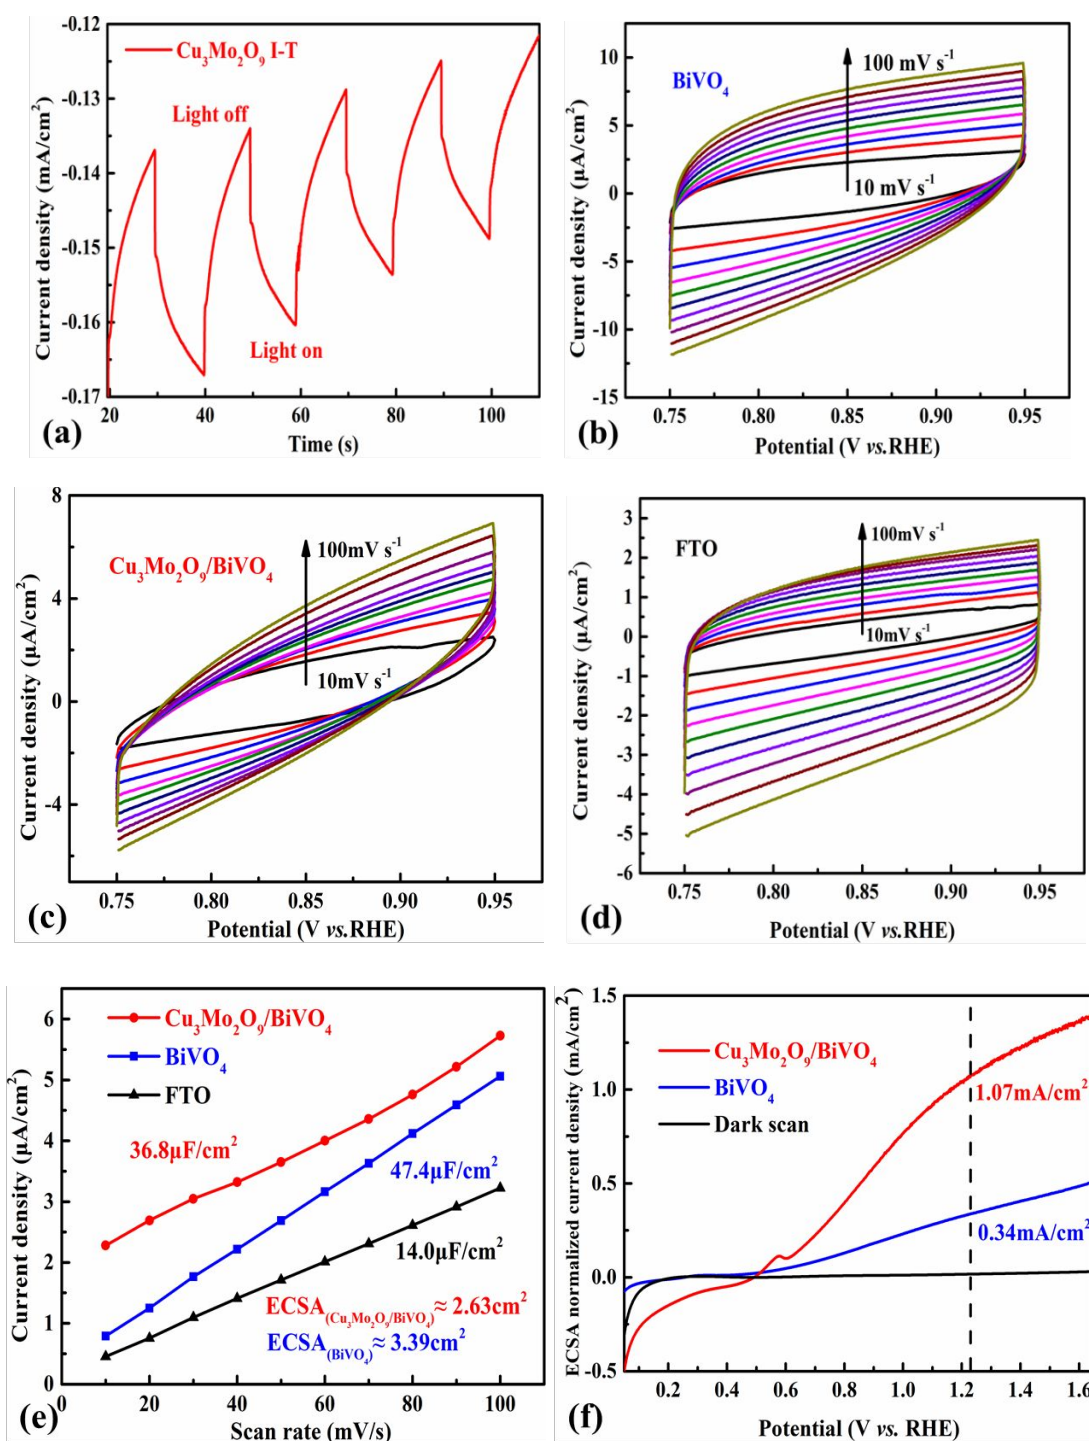

**Figure S5.** (a)  $j$ - $t$  curve of the  $\text{Cu}_3\text{Mo}_2\text{O}_9$  film at 0.1 V vs. RHE in 0.2 M NaPi under chopped AM 1.5 G illumination. CV curves of the (b) bare  $\text{BiVO}_4$ , (c)  $\text{Cu}_3\text{Mo}_2\text{O}_9/\text{BiVO}_4$  film and (d) FTO in 0.2 M NaPi with scan rates of 10, 20, 30, 40, 50, 60, 70, 80, 90 and 100 mV/s. (e) The  $\Delta I \sim \nu$  plots used for the determination of double-layer capacitance ( $C_{dl}$ ) at 0.85V vs. RHE for the bare  $\text{BiVO}_4$  and  $\text{Cu}_3\text{Mo}_2\text{O}_9/\text{BiVO}_4$  film. (f) The ECSA normalized photocurrent density vs. voltage curves for the bare  $\text{BiVO}_4$  and  $\text{Cu}_3\text{Mo}_2\text{O}_9/\text{BiVO}_4$  film in 0.2 M NaPi.

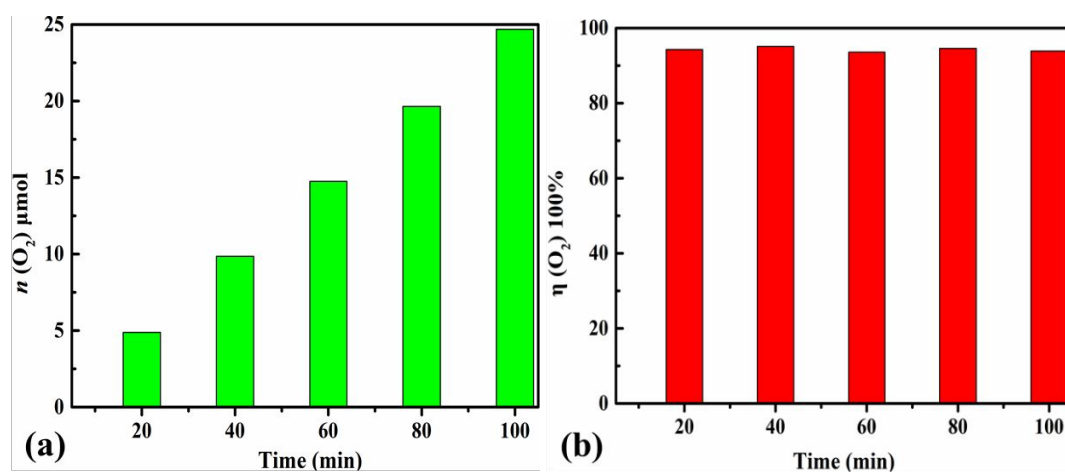

**Figure S6.** (a) The O<sub>2</sub> generation amount and (b) Faradaic efficiency for the  $\text{Cu}_3\text{Mo}_2\text{O}_9/\text{BiVO}_4$  film in 0.2 M NaPi under AM 1.5G illumination.

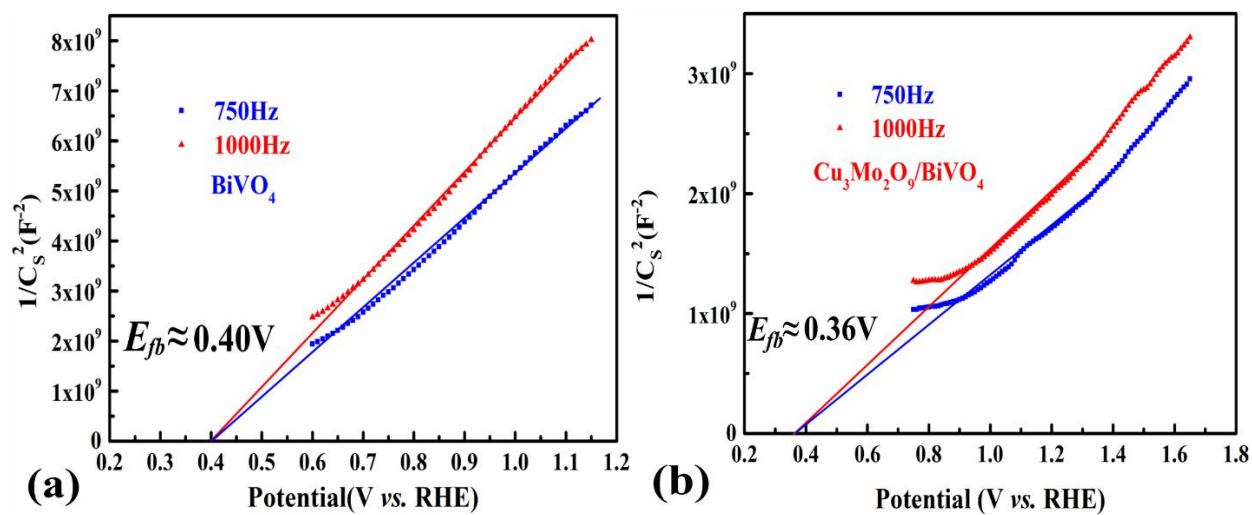

**Figure S7.** Mott-Schottky plots of (a) the bare  $BiVO_4$  and (b)  $Cu_3Mo_2O_9/BiVO_4$  film photoanode in 0.2M NaPi buffer.

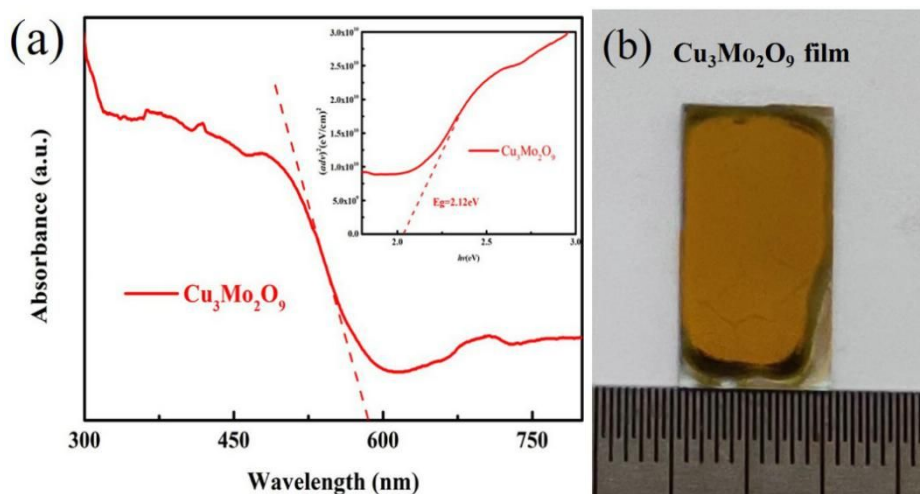

**Figure S8.** (a) UV-Vis absorbance spectrum and the related Tauc plots of the as-prepared  $\text{Cu}_3\text{Mo}_2\text{O}_9$  powder. (b) The photograph of the as-prepared  $\text{Cu}_3\text{Mo}_2\text{O}_9$  film.

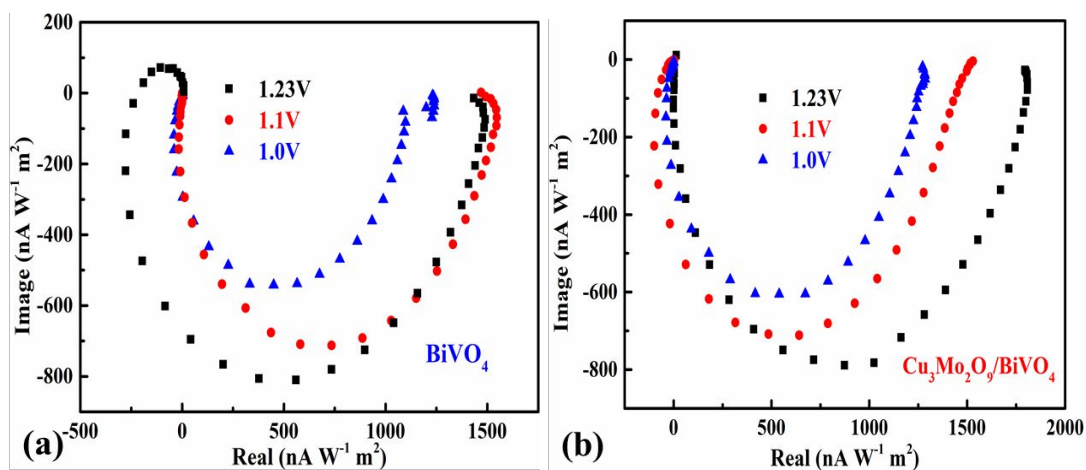

**Figure S9.** IMPS plots of the (a) bare  $\text{BiVO}_4$  film photoanode and (b)  $\text{Cu}_3\text{Mo}_2\text{O}_9/\text{BiVO}_4$  film photoanode in 0.2 M NaPi buffer (pH6.8) under an incident light wavelength of 365 nm ( $100 \text{ mW/cm}^2$ ) at 1.0, 1.1, 1.23V vs. RHE, respectively.

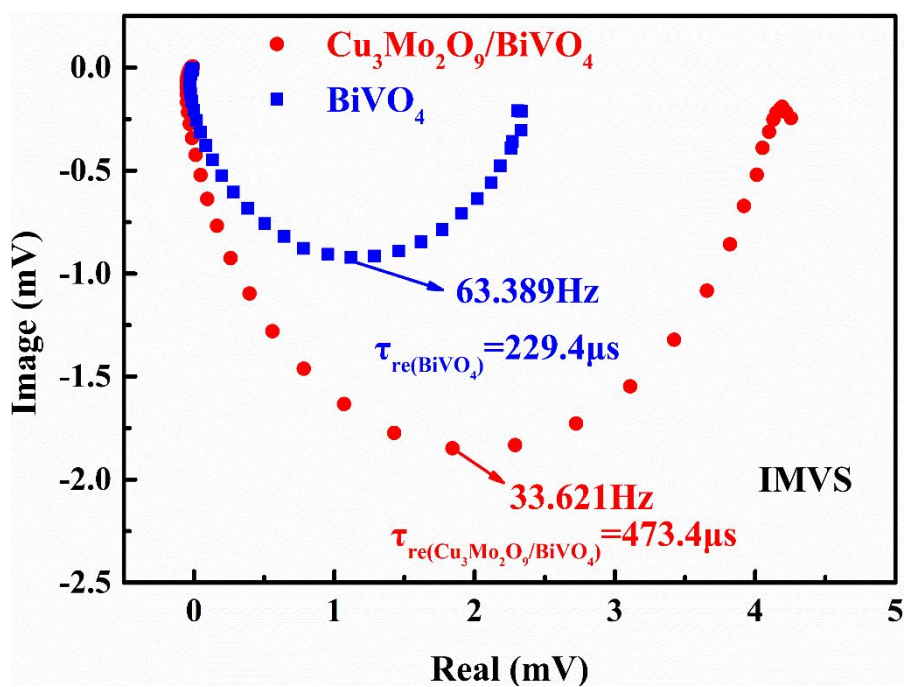

**Figure S10.** The IMVS plots and surface charge recombination time ( $\tau_{\text{re}}$ ) of the bare  $\text{BiVO}_4$  and  $\text{Cu}_3\text{Mo}_2\text{O}_9/\text{BiVO}_4$  film photoanode at 1.23 V vs. RHE in 0.2 M NaPi buffer.

**Table S1** The fitted element value for the equivalent circuit shown in the Nyquist Plots for the bare BiVO<sub>4</sub> (**Figure 5c**) and Cu<sub>3</sub>Mo<sub>2</sub>O<sub>9</sub>/BiVO<sub>4</sub> film photoanode (**Figure 5d**).

| Sample            | Rs/ $\Omega$ | CPE/F     | Rct/ $\Omega$ |
|-------------------|--------------|-----------|---------------|
|                   | (error/%)    | (error/%) | (error/%)     |
| BiVO <sub>4</sub> | 38.04        | 8.182E-5  | 509.3         |
|                   | (1.16%)      | (5.89%)   | (1.24%)       |

| Sample                                                            | Rs/ $\Omega$ | CPE <sub>1</sub> /F | Rct <sub>1</sub> / $\Omega$ | CPE <sub>2</sub> /F | Rct <sub>2</sub> / $\Omega$ |
|-------------------------------------------------------------------|--------------|---------------------|-----------------------------|---------------------|-----------------------------|
|                                                                   | (error/%)    | (error/%)           | (error/%)                   | (error/%)           | (error/%)                   |
| Cu <sub>3</sub> Mo <sub>2</sub> O <sub>9</sub> /BiVO <sub>4</sub> | 35.82        | 1.374E-5            | 47.8                        | 2.028E-5            | 130.6                       |
|                                                                   | (1.42%)      | (9.09%)             | (9.61%)                     | (7.68%)             | (7.49%)                     |
